# Supplementary material for: What do we know about Canadian involvement in medical tourism? A scoping review
Source: PubMed Central journal article supplement — Open Med. 2011 Aug 16;5(3):e139–48. (PMC3205829), 2011-08-16
Supplement: OpenMed-05-e139-s001.pdf [file OpenMed-05-e139-s001.pdf]

---

**Appendix A: Sample spreadsheet entry**

---

|                         |                                                                                                                                                                                                                                                                                                                                                                                                                                                                                                                                                                                                                                                                                                                                                                                                                                                                                                                                                                                                                                                                                                                                                                                                                                                                                                                                                                                                                                                                                                                                                                                                 |
|-------------------------|-------------------------------------------------------------------------------------------------------------------------------------------------------------------------------------------------------------------------------------------------------------------------------------------------------------------------------------------------------------------------------------------------------------------------------------------------------------------------------------------------------------------------------------------------------------------------------------------------------------------------------------------------------------------------------------------------------------------------------------------------------------------------------------------------------------------------------------------------------------------------------------------------------------------------------------------------------------------------------------------------------------------------------------------------------------------------------------------------------------------------------------------------------------------------------------------------------------------------------------------------------------------------------------------------------------------------------------------------------------------------------------------------------------------------------------------------------------------------------------------------------------------------------------------------------------------------------------------------|
| <b>Title</b>            | A bird can't fly on one wing                                                                                                                                                                                                                                                                                                                                                                                                                                                                                                                                                                                                                                                                                                                                                                                                                                                                                                                                                                                                                                                                                                                                                                                                                                                                                                                                                                                                                                                                                                                                                                    |
| <b>Journal</b>          | Health Expectations                                                                                                                                                                                                                                                                                                                                                                                                                                                                                                                                                                                                                                                                                                                                                                                                                                                                                                                                                                                                                                                                                                                                                                                                                                                                                                                                                                                                                                                                                                                                                                             |
| <b>Authors</b>          | Connor-Spady et al.                                                                                                                                                                                                                                                                                                                                                                                                                                                                                                                                                                                                                                                                                                                                                                                                                                                                                                                                                                                                                                                                                                                                                                                                                                                                                                                                                                                                                                                                                                                                                                             |
| <b>Year</b>             | 2007                                                                                                                                                                                                                                                                                                                                                                                                                                                                                                                                                                                                                                                                                                                                                                                                                                                                                                                                                                                                                                                                                                                                                                                                                                                                                                                                                                                                                                                                                                                                                                                            |
| <b>Type of study</b>    | Qualitative: open-ended survey                                                                                                                                                                                                                                                                                                                                                                                                                                                                                                                                                                                                                                                                                                                                                                                                                                                                                                                                                                                                                                                                                                                                                                                                                                                                                                                                                                                                                                                                                                                                                                  |
| <b>Country</b>          | Canada                                                                                                                                                                                                                                                                                                                                                                                                                                                                                                                                                                                                                                                                                                                                                                                                                                                                                                                                                                                                                                                                                                                                                                                                                                                                                                                                                                                                                                                                                                                                                                                          |
| <b>Analysis</b>         | Content analysis                                                                                                                                                                                                                                                                                                                                                                                                                                                                                                                                                                                                                                                                                                                                                                                                                                                                                                                                                                                                                                                                                                                                                                                                                                                                                                                                                                                                                                                                                                                                                                                |
| <b>Sample</b>           | 432 patients who had had hip or knee surgery in Saskatchewan 3–12 months before the study                                                                                                                                                                                                                                                                                                                                                                                                                                                                                                                                                                                                                                                                                                                                                                                                                                                                                                                                                                                                                                                                                                                                                                                                                                                                                                                                                                                                                                                                                                       |
| <b>Canadian content</b> | <ul style="list-style-type: none"><li>• “Canadians have identified long waits as the primary barrier to specialized services.”</li><li>• The majority of respondents to the survey felt their wait was acceptable and they were treated fairly.</li><li>• Approximately 80% agreed priority should be given to those in more pain or trouble than themselves.</li><li>• “If given a choice of going to another orthopedic surgeon with a shorter waiting time, 68% would not consider changing their surgeon, 15% would and 17% were uncertain.”</li><li>• “For those who would not change their surgeon, the most common reasons were satisfaction with their surgeon and surgery, confidence and trust in their surgeon, competence and skill of the surgeon, and the bedside manner of their surgeon.”</li><li>• “For those who would change their surgeon, it was usually because of unbearable pain. For those patients who were not sure, their answers were conditional on the amount of pain, the length of their waiting time and on a recommendation from their family doctor.”</li><li>• Only 5% of respondents used the theme of taking one's turn as justification for their wait.</li><li>• “How long patients expected to wait can be interpreted as an anticipated outcome, based on what they actually believe will happen, likely conditioned by the environment in which they wait. Patients described the source of these expectations as their surgeon, reported experiences from other people and a general belief that patients wait a long time for surgery.”</li></ul> |

---
